# Supplementary material for: A Novel Method for Measuring Serum Unbound Bilirubin Levels Using Glucose Oxidase–Peroxidase and Bilirubin-Inducible Fluorescent Protein (UnaG): No Influence of Direct Bilirubin
Source: MDPI journal article supplement (doi:10.3390/ijms21186778), 2020-09-16
Supplement: s1 [file s1]

**Table S1.** Effect of ascorbic acid in serum on unconjugated bilirubin (indirect bilirubin) measurements by UnaG method.

| Sample | Ascorbic acid (mg/mL) | iDB levels (mg/dL) |
|--------|-----------------------|--------------------|
| (a)    | 1000 (100%)           | 15.7               |
|        | 100 (10%)             | 15.6               |
|        | 10 (1%)               | 15.3               |
|        | 1 (0.1%)              | 15.3               |
|        | 0 (0%)                | 15.4               |
| (b)    | 1000 (100%)           | 8.2                |
|        | 100 (10%)             | 8.1                |
|        | 10 (1%)               | 8.3                |
|        | 1 (0.1%)              | 8.0                |
|        | 0 (0%)                | 8.2                |

Serum samples (a) and (b) contained an iDB of 16.9 and 7.8 mg/dL, respectively, as determined by the bilirubin oxidase method. See in Section 4.1.3.

UnaG method was carried out based on the reference #10.

iDB, indirect bilirubin; UnaG, bilirubin-inducible fluorescent protein from eel muscle.
